# Supplementary material for: Stemness and immune evasion conferred by the TDO2‐AHR pathway are associated with liver metastasis of colon cancer
Source: PubMed Central journal article supplement — Cancer Sci. 2021 Dec 2;113(1):170–81. doi: 10.1111/cas.15182 (PMC8748246; doi:10.1111/cas.15182), 2021-12-02
Supplement: CAS-113-170-s003.pdf [file CAS-113-170-s003.pdf]

**(A)**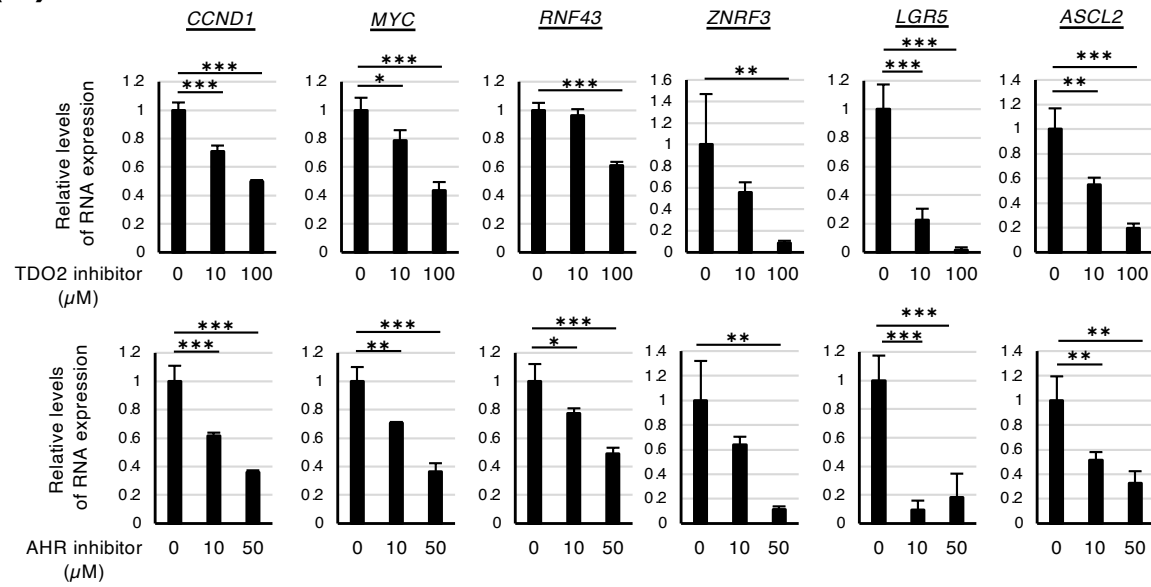**(B)**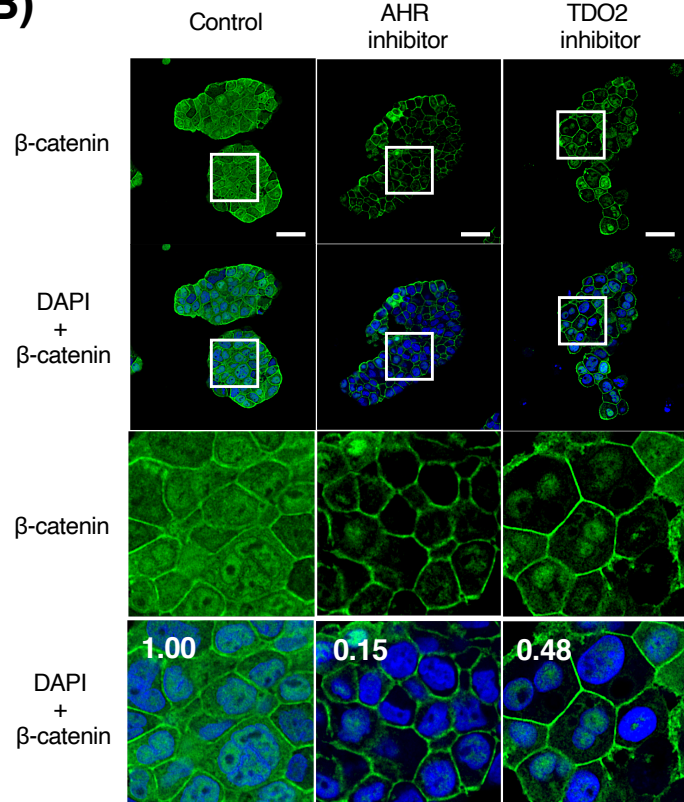**(C)**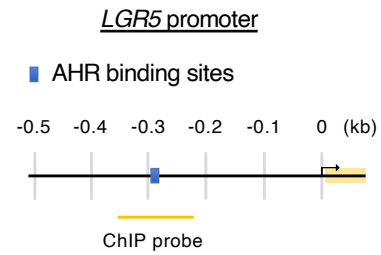**(D)**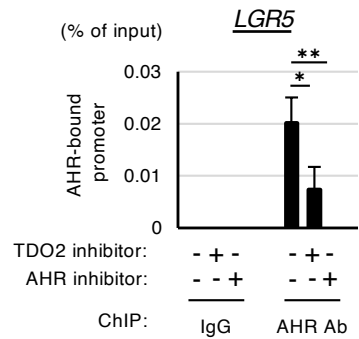

**FIGURE S6** The TDO2-AHR pathway is required for transactivation of *LGR5* and Wnt signaling in colon cancer spheroids. A, qPCR analyses of representative Wnt target genes in the metastatic spheroids (CRC-29M) after treatment with the indicated concentration of the inhibitor of (upper panels) TDO2 or (lower panels) AHR for 96 hrs. B, Immunostaining of the spheroids (CRC-29M) with  $\beta$ -catenin in the presence of the indicated inhibitor for 96 hrs. Nuclei were counterstained with DAPI. Relative quantification values of nuclear  $\beta$ -catenin were shown in the bottom columns. The bar represents 25  $\mu$ m. C, Schematic representation of predicted AHR binding sites in the promoters of *LGR5*. D, ChIP analyses of the AHR-bound promoters of the *LGR5* gene in spheroid cells (CRC-29M) treated with the TDO2 inhibitor (100  $\mu$ M) or AHR inhibitor (50  $\mu$ M) for 96 hr. Enrichment over input (% input) was measured by qPCR. Values represent the mean  $\pm$  s.d. \* $P$  < 0.05, \*\* $P$  < 0.01, \*\*\* $P$  < 0.001.
