# Supplementary material for: Stemness and immune evasion conferred by the TDO2‐AHR pathway are associated with liver metastasis of colon cancer
Source: PubMed Central journal article supplement — Cancer Sci. 2021 Dec 2;113(1):170–81. doi: 10.1111/cas.15182 (PMC8748246; doi:10.1111/cas.15182), 2021-12-02
Supplement: CAS-113-170-s007.pdf [file CAS-113-170-s007.pdf]

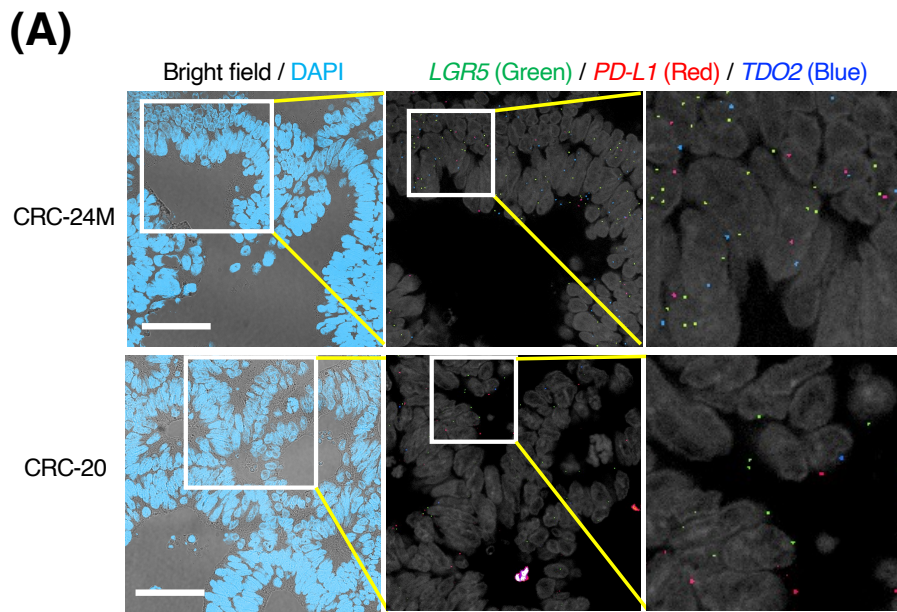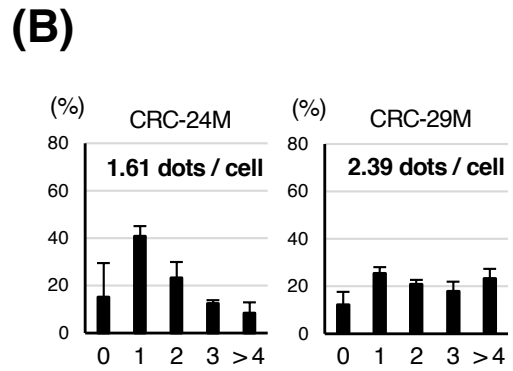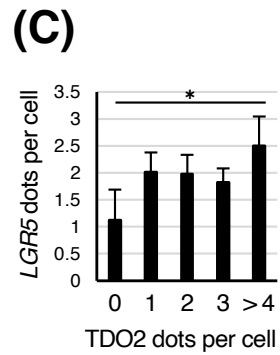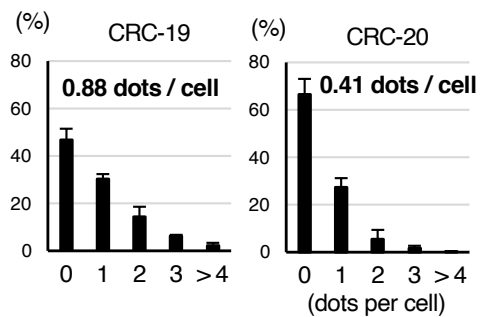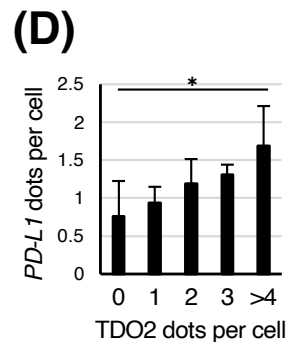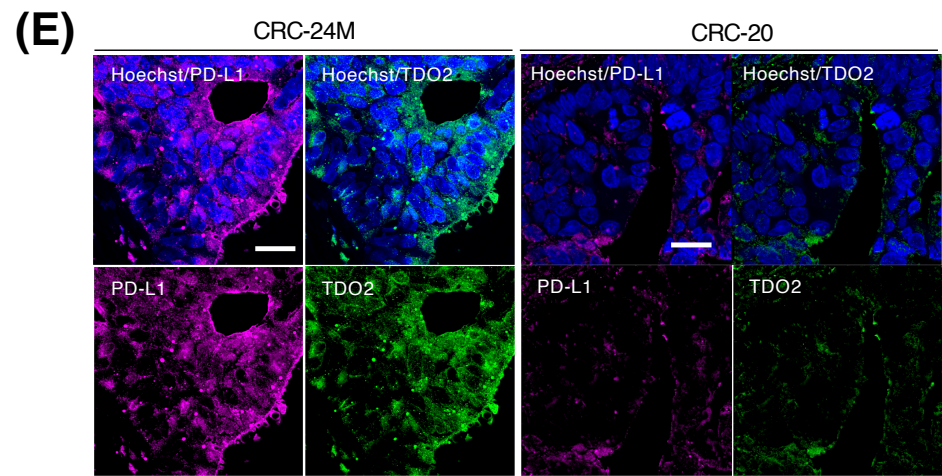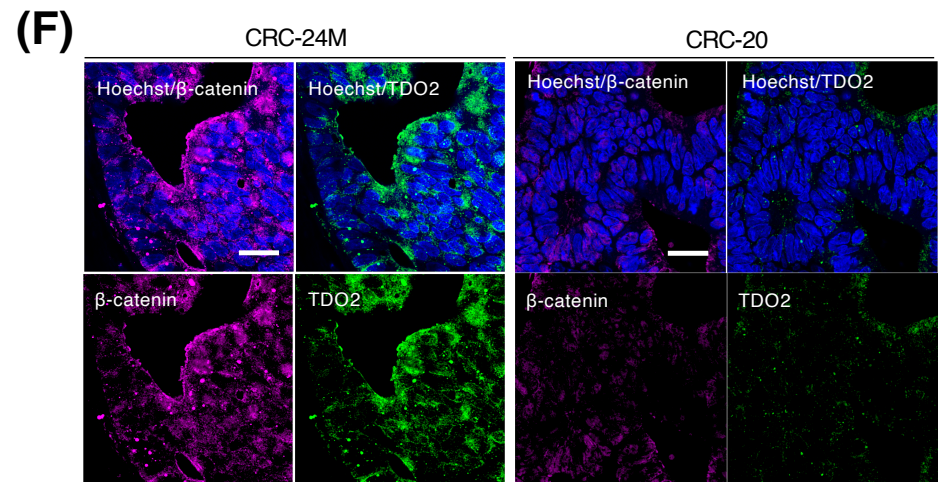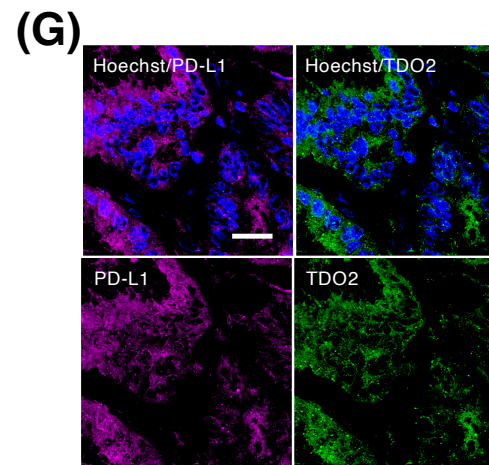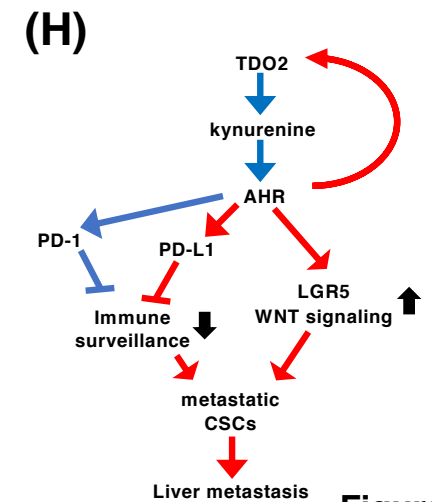

Figure S7

**FIGURE S7** *TDO2* is coexpressed with *LGR5* and *PD-L1* in colon tumors. A, *In situ* RNA hybridization of xenografted tumors derived from cancer spheroids. (Left column) Merged images of bright field microscopy and DAPI staining of the tumors derived from CRC-24M or CRC-20. Scale bar: 50  $\mu\text{m}$ . (Right panels) Multiple fluorescence *in situ* RNA hybridization with *LGR5* (green), *PD-L1* (red) and *TDO2* (blue) probes. Images acquired at a higher magnification are shown at right. B, Quantitation of the proportions of xenograft tumor cells with the indicated numbers of hybridizing dots for *TDO2*. Data from xenograft tumors derived from metastatic spheroids (CRC-24M and CRC-29M) and nonmetastatic spheroids (CRC-19 and CRC-20) are shown. C, D, Correlation of the average number of hybridizing dots for (C) *LGR5* or (D) *PD-L1* with the indicated number of dots for *TDO2* in xenografted tumors (CRC-24M). The hybridization data shown in (A) were used for the counting (n=3). E, Representative coimmunostaining of xenograft tumors (CRC-24M and CRC-20) for PD-L1 and TDO2. Nuclei was counterstained with Hoechst 33342. Scale bar: 10  $\mu\text{m}$ . F, Representative coimmunostaining of xenograft tumors (CRC-24M and CRC-20) for  $\beta$ -catenin and TDO2. Nuclei was counterstained with Hoechst 33342. Scale bar: 10  $\mu\text{m}$ . G, Representative coimmunostaining of surgical specimens of primary colon cancer of patients with liver metastasis (patient-2). Nuclei was counterstained with Hoechst 33342. Scale bar: 10  $\mu\text{m}$ . H, A proposed model for the TDO2-kynurenine pathway-mediated regulation of antitumor immunity and cancer stemness in the tumor microenvironment. The TDO2-kynurenine pathway activates AHR, and activated AHR induces *PD-L1*-mediated immune evasion and promotes cancer stemness, leading to the generation of immune-evasive CSCs, thereby facilitating liver metastasis. Pathways shown in red are presented in this paper and those in blue were previously documented. Values represent the mean  $\pm$  s.d. \* $P < 0.05$ , \*\* $P < 0.01$ , \*\*\* $P < 0.001$ .
