# Supplementary material for: Stemness and immune evasion conferred by the TDO2‐AHR pathway are associated with liver metastasis of colon cancer
Source: PubMed Central journal article supplement — Cancer Sci. 2021 Dec 2;113(1):170–81. doi: 10.1111/cas.15182 (PMC8748246; doi:10.1111/cas.15182), 2021-12-02
Supplement: CAS-113-170-s014.pdf [file CAS-113-170-s014.pdf]

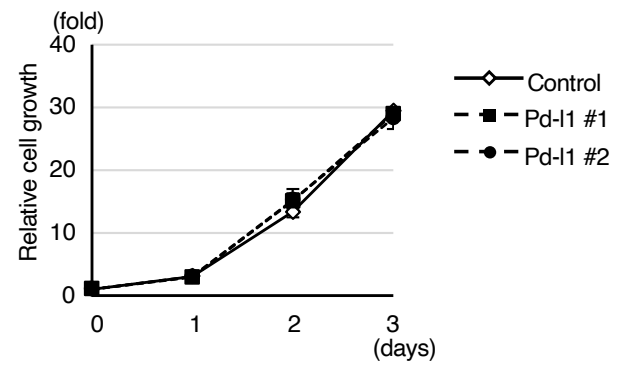

Figure S4

**FIGURE S4** The effects of Tdo2 overexpression upon proliferation of CT26 *in vitro*. Time course of proliferation of CT26/GFP/Flag-Tdo2 cells in which *Pd-1* was knocked out (Pd-I1 #1, Pd-I1 #2) and the control cells.
